# Supplementary material for: Japanese Consumers’ Attitudes towards Obtaining and Sharing Health Information Regarding Over-the-Counter Medication: Designing an Over-the-Counter Electronic Health Record
Source: MDPI journal article supplement (doi:10.3390/healthcare11081166), 2023-04-18
Supplement: s1 [file s1]

**Table S1.** Survey questions and hypotheses

| Research Hypotheses                                                                                                                                                                                                                                                                                                                                                                                                                                                                                                             |                                   |
|---------------------------------------------------------------------------------------------------------------------------------------------------------------------------------------------------------------------------------------------------------------------------------------------------------------------------------------------------------------------------------------------------------------------------------------------------------------------------------------------------------------------------------|-----------------------------------|
| H1: Consumers exhibit a positive attitude towards obtaining user-shared health information on OTC medication.                                                                                                                                                                                                                                                                                                                                                                                                                   |                                   |
| H2: Consumers exhibit a positive attitude towards sharing anonymized health information while using OTC medication.                                                                                                                                                                                                                                                                                                                                                                                                             |                                   |
| H3: There is a positive association between consumers obtaining and sharing health information regarding OTC medication.                                                                                                                                                                                                                                                                                                                                                                                                        |                                   |
| H4: Consumers with high eHealth literacy have a greater inclination to obtain user-shared information regarding OTC medication.                                                                                                                                                                                                                                                                                                                                                                                                 |                                   |
| H5: Consumers with high eHealth literacy are more optimistic about sharing anonymized health information regarding OTC medication.                                                                                                                                                                                                                                                                                                                                                                                              |                                   |
| Survey Questions                                                                                                                                                                                                                                                                                                                                                                                                                                                                                                                |                                   |
| Survey Questions                                                                                                                                                                                                                                                                                                                                                                                                                                                                                                                | Corresponding Research Hypotheses |
| <b>Participant characteristics</b>                                                                                                                                                                                                                                                                                                                                                                                                                                                                                              |                                   |
| Japanese version of the eHealth Literacy Scale (J-eHEALS) [51]                                                                                                                                                                                                                                                                                                                                                                                                                                                                  | H4, H5                            |
| Gender                                                                                                                                                                                                                                                                                                                                                                                                                                                                                                                          |                                   |
| Age                                                                                                                                                                                                                                                                                                                                                                                                                                                                                                                             |                                   |
| <b>Attitudes towards obtaining user-shared OTC medication information</b>                                                                                                                                                                                                                                                                                                                                                                                                                                                       |                                   |
| (i) If there were a database of post-dose health information shared from past users of the OTC medication you purchase, do you think it would be helpful when deciding to choose the medication?<br>The response options ranged from “very helpful = 5” to “not helpful at all = 1.”                                                                                                                                                                                                                                            | H1, H3, H4                        |
| (ii) What information would you like to refer to in this user-shared report?<br>Respondents were asked to select all suitable answers from the following: “efficacy of medicines,” “safety of medicines,” “average time from taking a medicine to effects,” “duration of drug effect,” “symptoms of side effects,” “incidence of side effects,” “others,” “I do not want to know any information.”                                                                                                                              | H1                                |
| (iii) Enter the reasons for choosing the responses in the free response text box.                                                                                                                                                                                                                                                                                                                                                                                                                                               | H1                                |
| <b>Usage of health-related applications and inclination to share anonymized health information</b>                                                                                                                                                                                                                                                                                                                                                                                                                              |                                   |
| (i) Do you use a medication notebook application or an application that monitors your health condition, such as entering body temperature, on your smartphone?<br>Respondents were asked to select one of the following answers that best applies to them: “I only use the medication notebook application,” “I only use the health observation application,” “I use both the medication notebook and the health observation applications,” “I have a smartphone but use neither application,” and “I do not use a smartphone.” | H3                                |
| (ii) Do you think it is acceptable for information about your physical condition and medicines used entered into the application to be provided to others after anonymization?<br>The answers were “I think it is a good thing,” “not okay,” “neither,” and “I do not know.”                                                                                                                                                                                                                                                    | H2, H3, H5                        |
